# Supplementary material for: The Quality of Colonoscopy Reporting in Usual Practice: Are Endoscopists Reporting Key Data Elements?
Source: Hindawi journal article supplement (doi:10.1155/2016/1929361), 2016-01-01

**Supplementary Figure 1:** Non-mandatory data elements reported by decile.

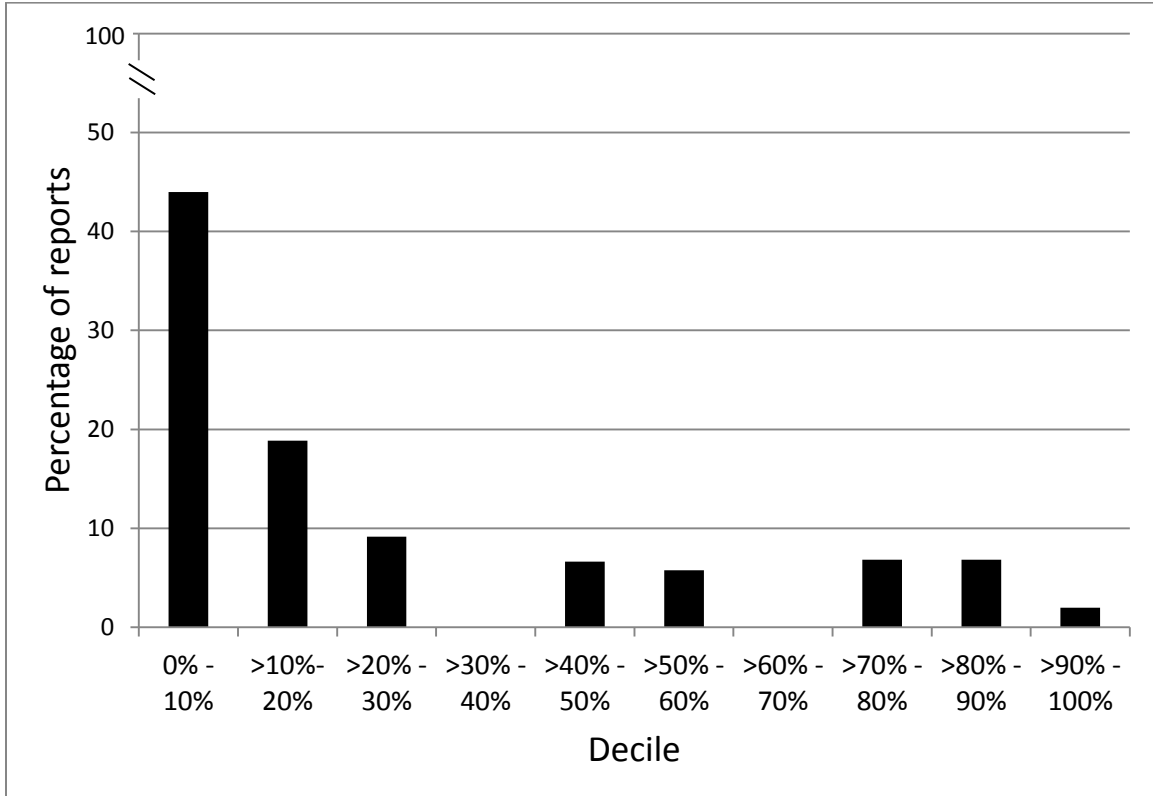

Supplement: f1 [file 1929361.f1.pdf]
